# Supplementary material
Source: publisher figshare collection journal article supplement (https://acs.figshare.com/ndownloader/files/28818690)
Supplement: Supplementary file 1 [file 28818690]

# Supporting Information

## Lignin Nanoparticles: Promising Sustainable Building Block of Photoluminescent and Haze Film for Improving Efficiency of Solar Cells

*Xue Wang,<sup>a</sup> Huanxin Guo,<sup>c</sup> Zonghao Lu,<sup>a</sup> Xue Liu,<sup>a</sup> Xiongfei Luo,<sup>a</sup> Shujun Li,<sup>a,b</sup> Shouxin Liu,<sup>a,b</sup> Jian Li,<sup>a,b</sup> Yongzhen Wu<sup>\*c</sup> and Zhijun Chen<sup>\*,a,b</sup>*

<sup>a</sup> Engineering Research Center of Advanced Wooden Materials, Ministry of Education, Northeast Forestry University, Hexing Road 26, Harbin 150040, P.R. China

<sup>b</sup> Key Laboratory of Bio-based Material Science & Technology of Ministry of Education, Northeast Forestry University, Hexing Road 26, Harbin 150040, P.R. China

<sup>c</sup> Institute of Fine Chemicals, School of Chemistry and Molecular Engineering, East China University of Science & Technology, Meilong Road 130, Shanghai 200237, P.R. China

\* Correspondence: [chenzhijun@nefu.edu.cn](mailto:chenzhijun@nefu.edu.cn); [wu.yongzhen@ecust.edu.cn](mailto:wu.yongzhen@ecust.edu.cn)

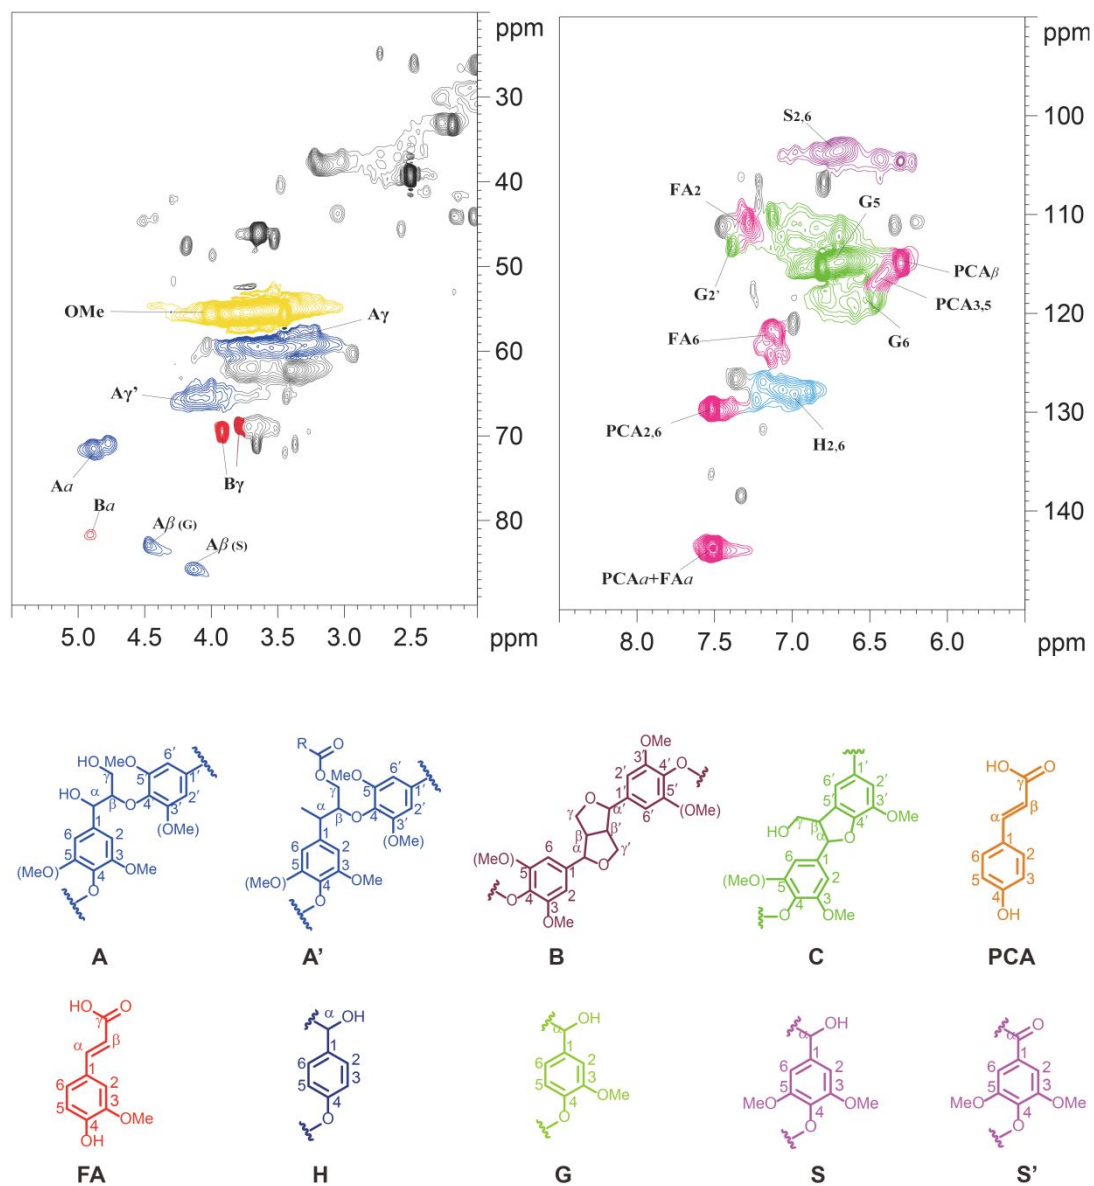

**Figure S1.** 2D HSQC NMR spectra of lignin.



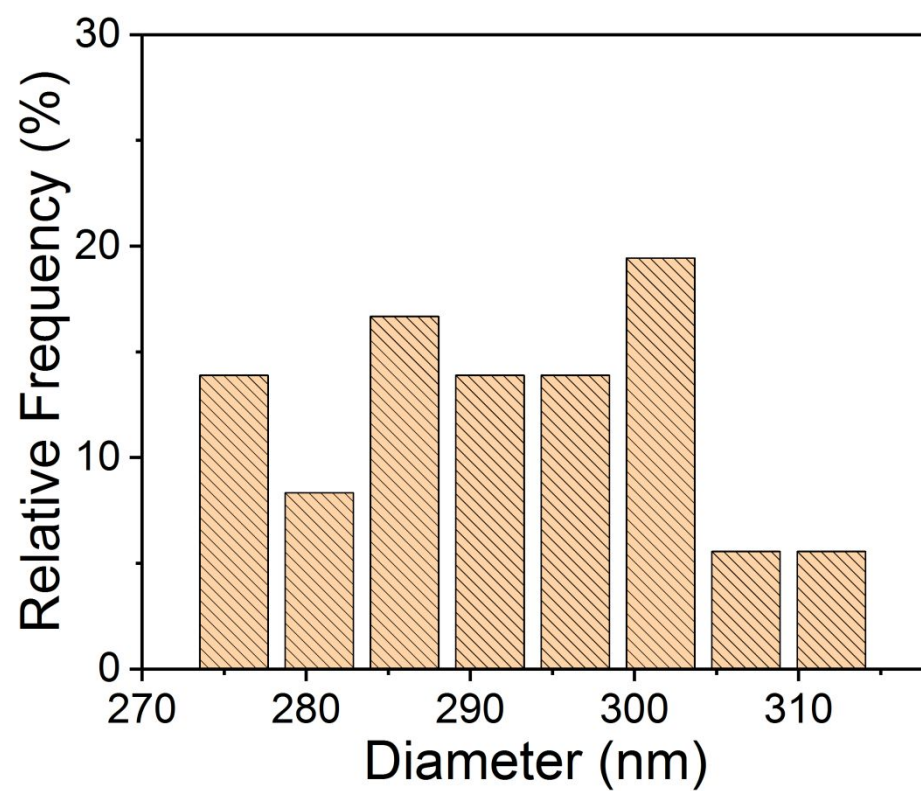

**Figure S3.** Particle size histogram of L-H-NPs.

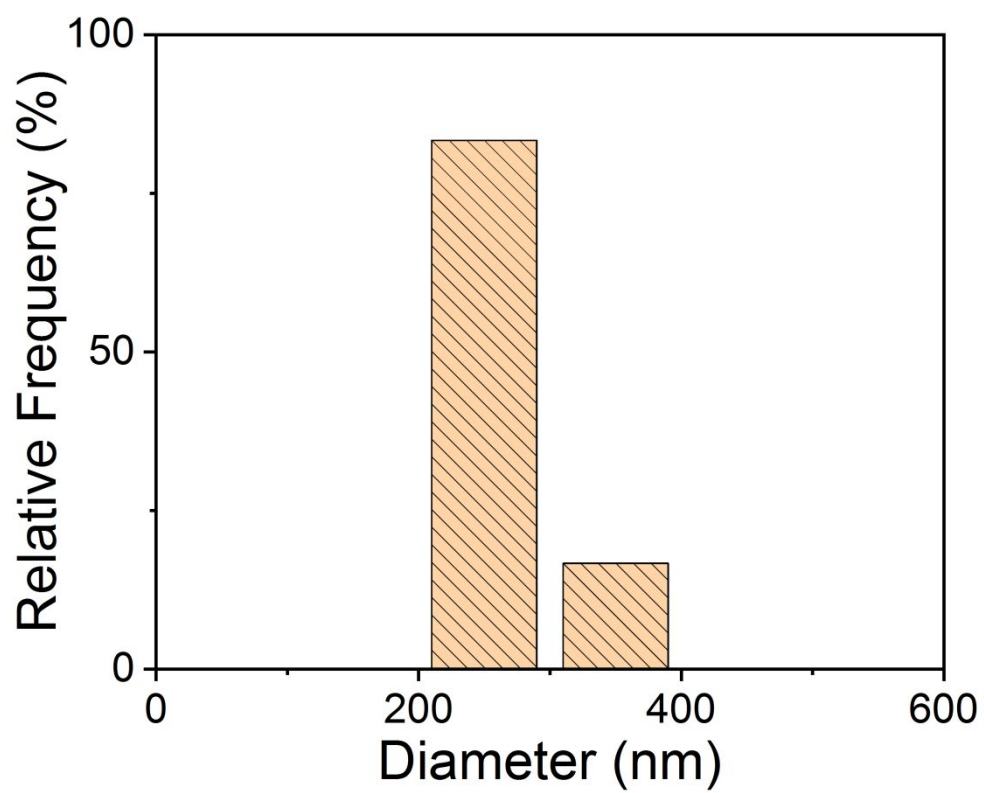

**Figure S4.** Particle size histogram of L-MS-NPs.

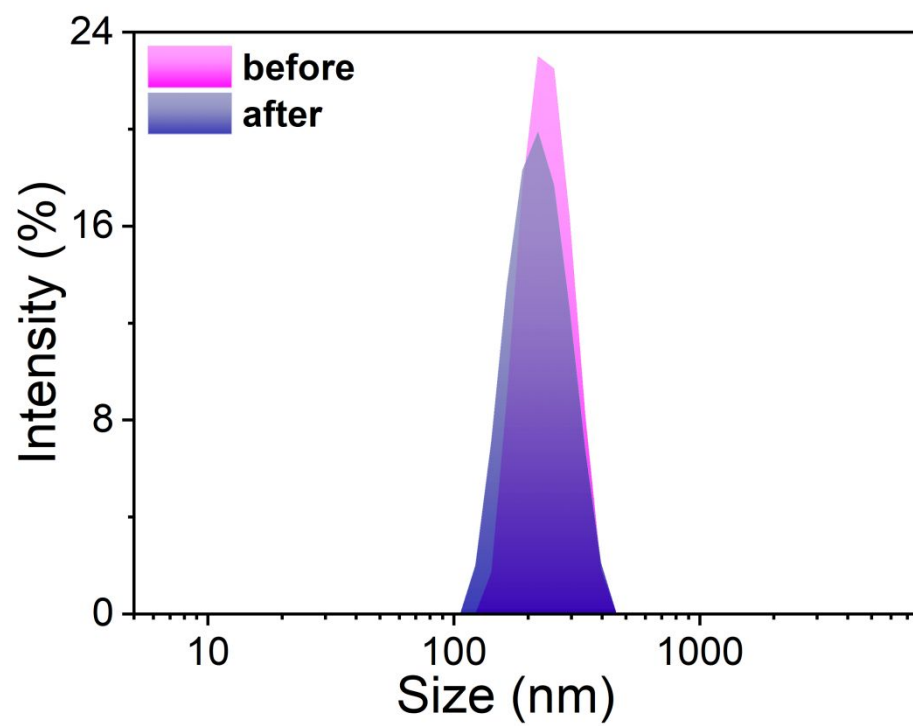

**Figure S5.** Particle size of L-MS-NPs before and after ultrasonic damage experiment (at 120 W for 5 min).

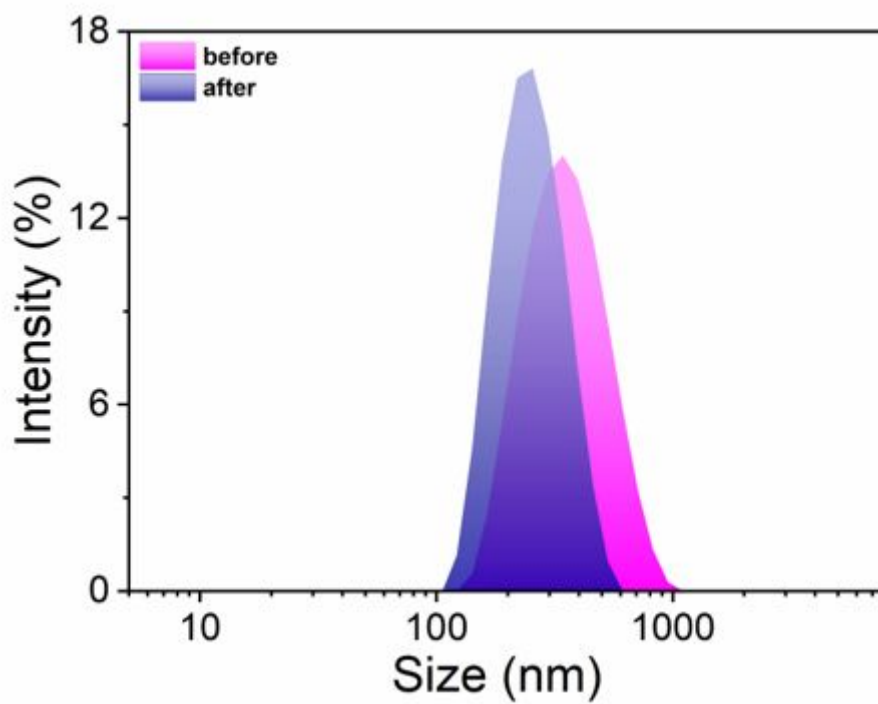

**Figure S6.** Particle size of L-H-NPs before and after ultrasonic damage experiment (at 120 W for 5 min).

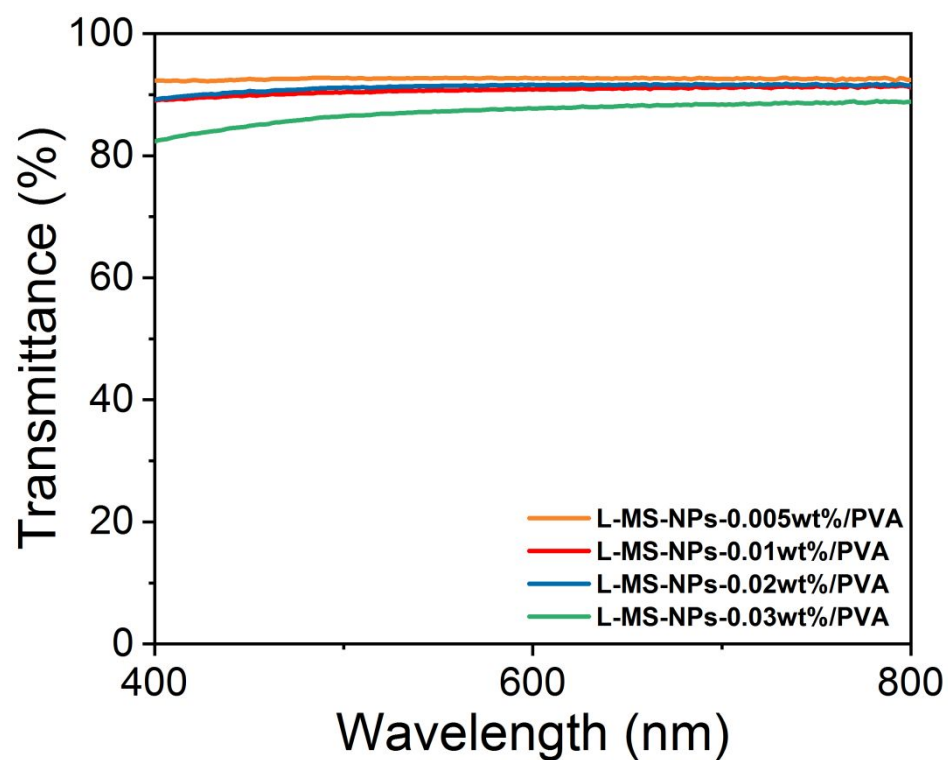

**Figure S7.** Total forward transmittance of L-MS-NPs/PVA composite films at different amounts of L-MS-NPs.

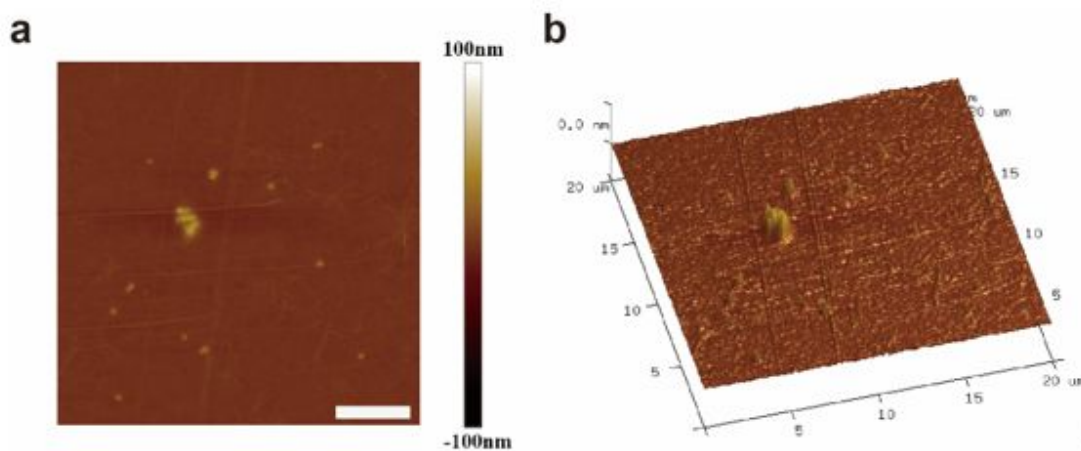

**Figure S8.** (a) AFM height image and (b) 3D AFM image of L-H-NPs/PVA composite film with scan area of  $20 \times 20 \mu\text{m}^2$  (scale bar =  $4 \mu\text{m}$ ).



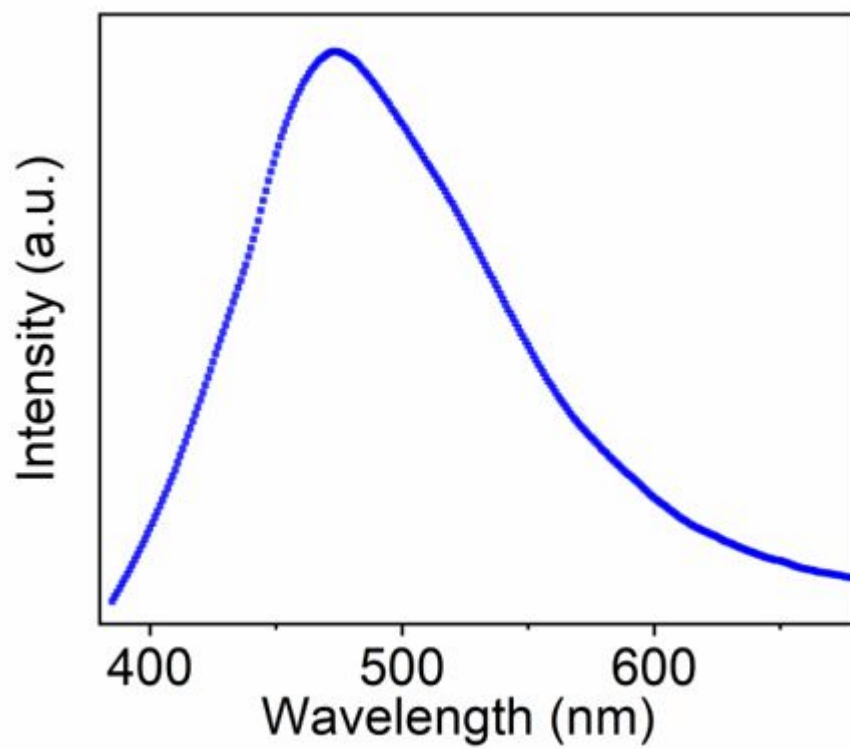

**Figure S9.** Fluorescence emission of L-MS-NPs, Ex = 365 nm.

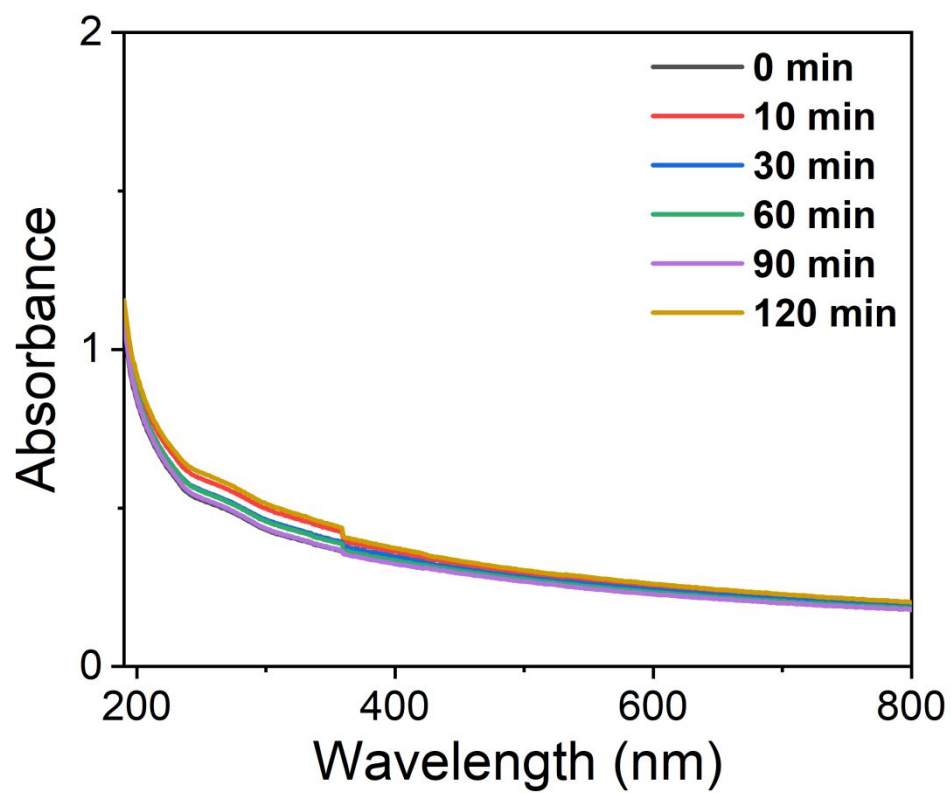

**Figure S10.** Optical stability of L-MS-NPs-0.01wt%/PVA composite film (under standard 1 sun irradiation, 100 mW/cm<sup>2</sup>, 2 h).

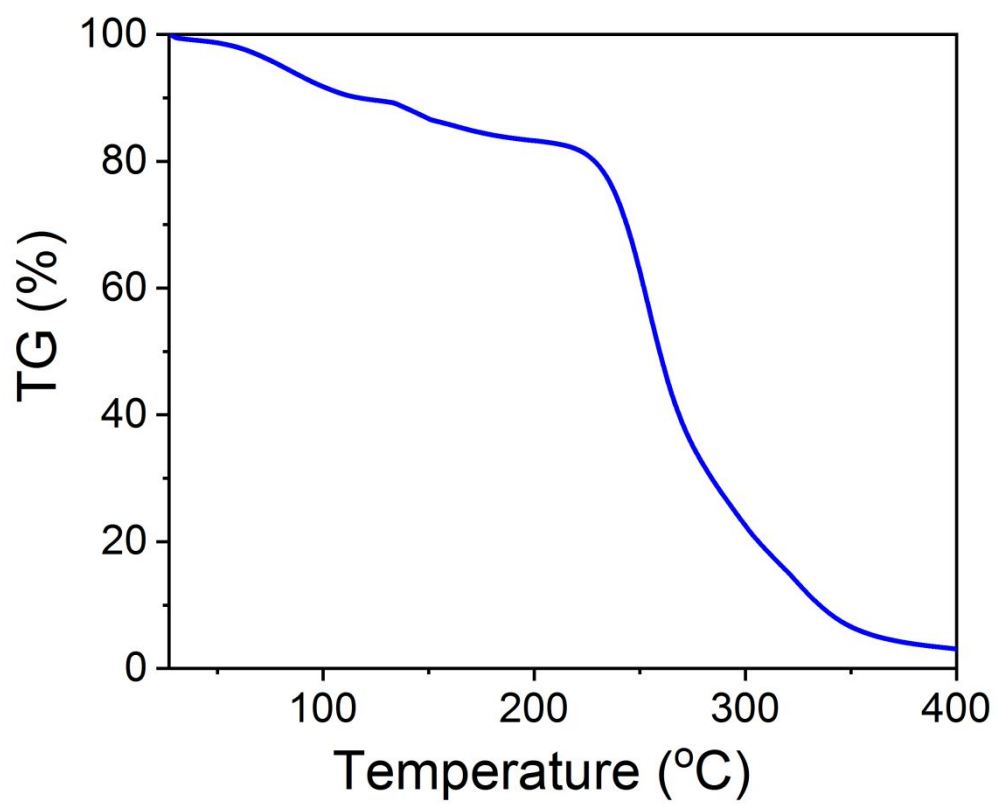

**Figure S11.** TG curve of L-MS-NPs-0.01wt%/PVA composite film.

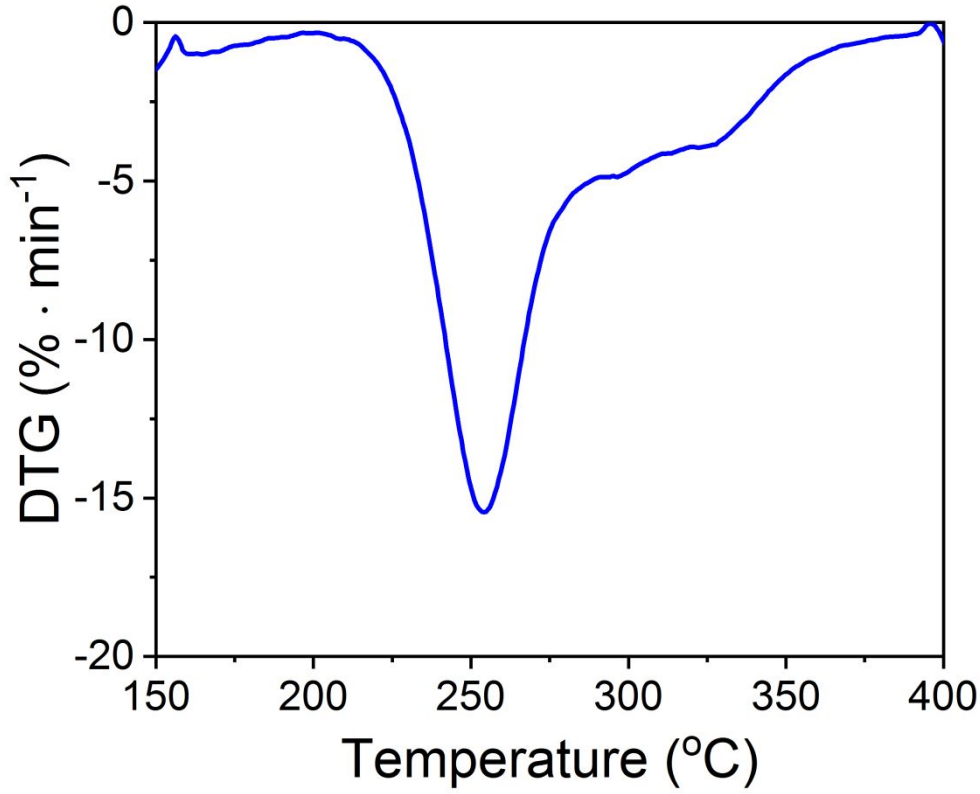

**Figure S12.** DTG curve of L-MS-NPs-0.01wt%/PVA composite film.

The power conversion efficiency (PCE) was calculated using **Equation S1**:

$$\text{PCE} = \frac{I_{SC} \times V_{OC} \times FF}{P_{in}}$$

where  $I_{SC}$  is the short-circuit current,  $V_{OC}$  is the open-circuit photovoltage,  $FF$  is the fill factor,  $P_{in}$  is the incident light power. The external quantum efficiency (EQE) was calculated using **Equation S2**:

$$\text{EQE} = \frac{N_e}{N_p} \times 100\%$$

where  $N_e$  is the number of external circuit electrons,  $N_p$  is the number of incident monochromatic photon.
